# Supplementary material for: Altered Modular Organization of Functional Connectivity Networks in Cirrhotic Patients without Overt Hepatic Encephalopathy
Source: Hindawi journal article supplement (doi:10.1155/2014/727452), 2014-01-01
Supplement: f1 [file 727452.f1.pdf]

## Supplementary materials

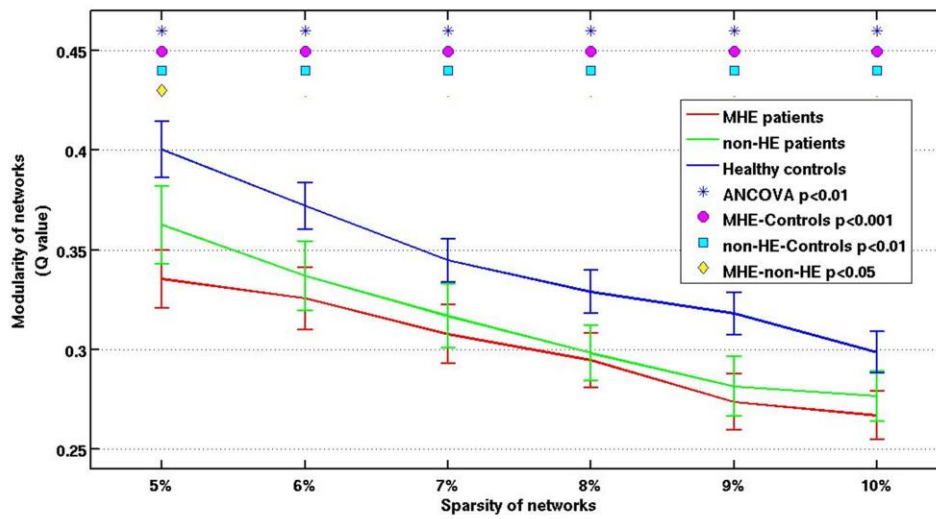

**Supplementary figure 1** The network modularity Q values of healthy controls, non-HE and MHE patients from sparsity=5% to sparsity=10% at 1% intervals. (Based on 1024 parcels)

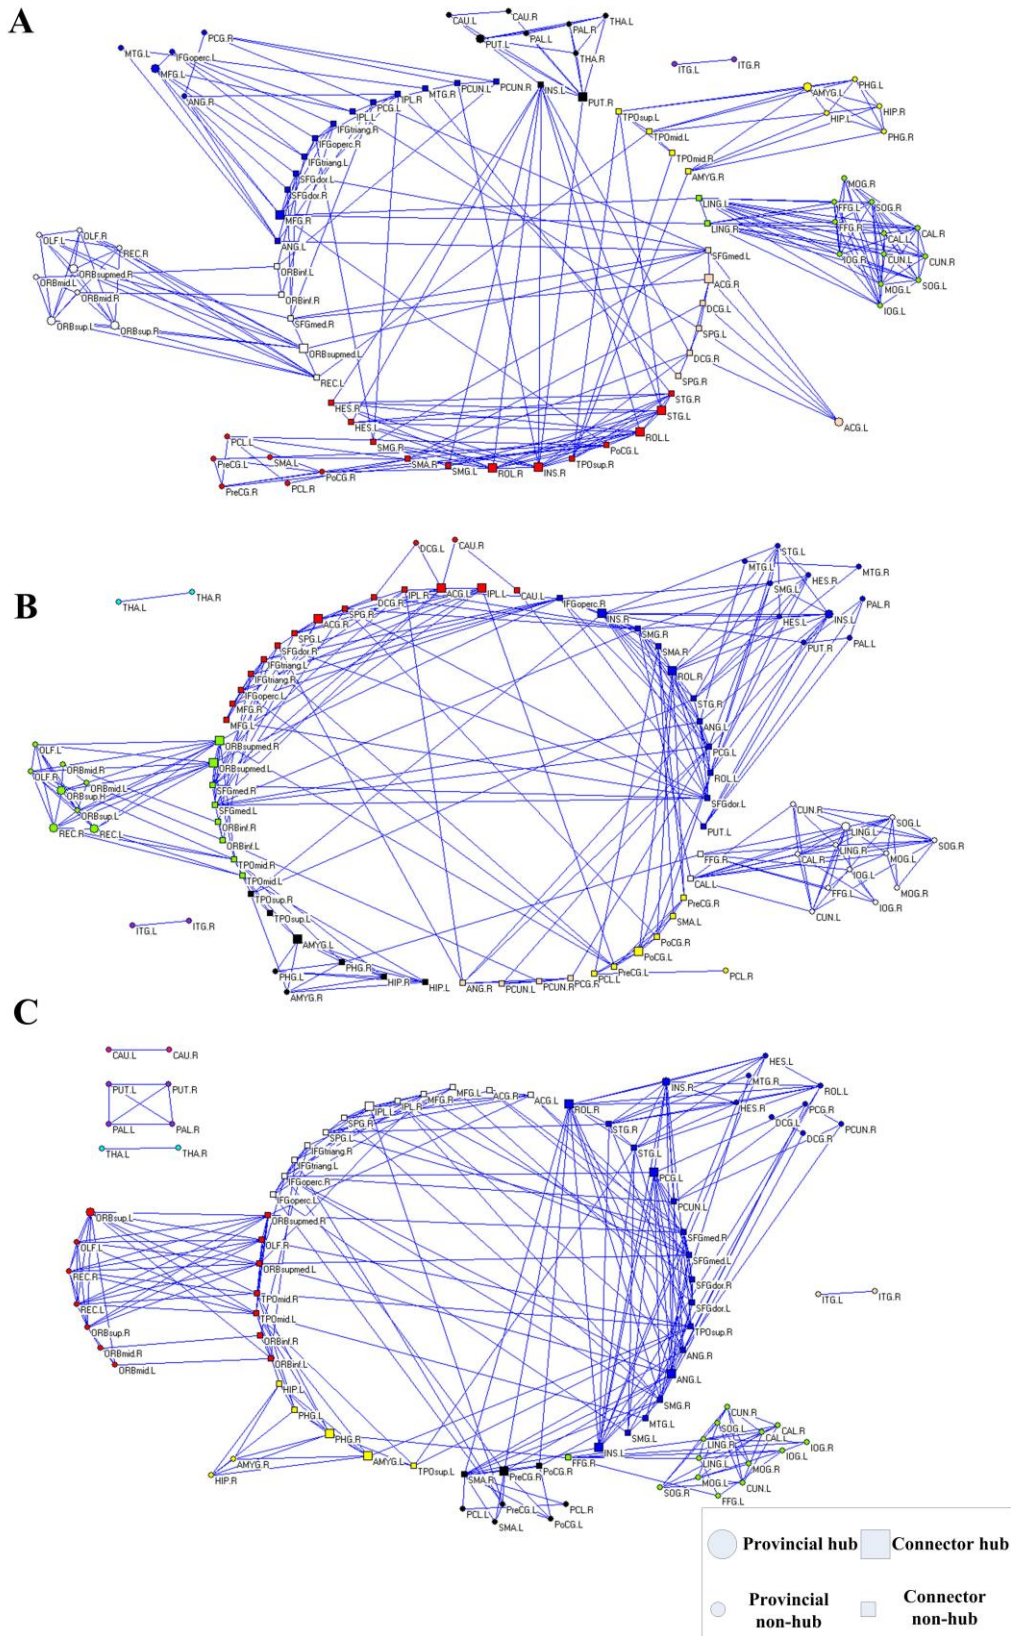

**Supplementary figure 2** The community structures of healthy control, non-HE and MHE groups' for mean functional networks at sparsity=7%. A. The community

structure of Healthy control group; B. The community structure of non-HE group; C. The community structure of MHE group.

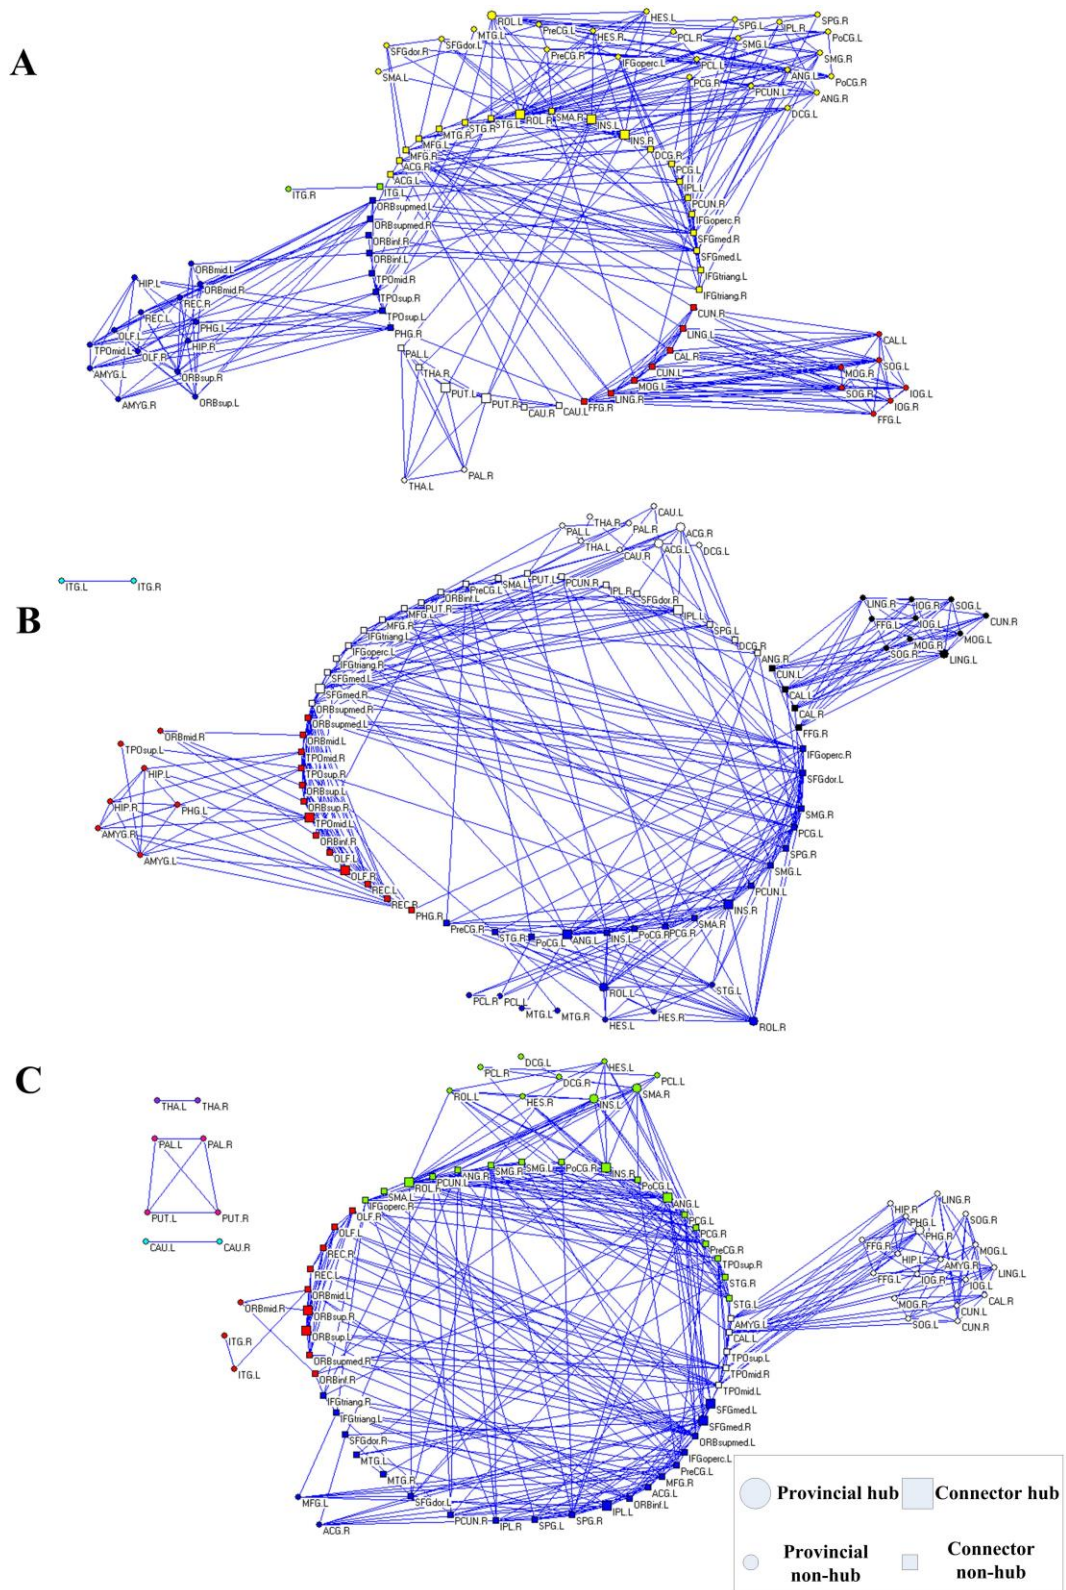

**Supplementary figure 3** The community structures of healthy control, non-HE and MHE groups' for mean functional networks at sparsity=9%. A. The community

structure of Healthy control group; B. The community structure of non-HE group; C. The community structure of MHE group.
